# Supplementary material
Source: publisher figshare collection journal article supplement (https://frontiersin.figshare.com/ndownloader/files/22303953)

**A**

mRNA expression (RNAseq): CANX

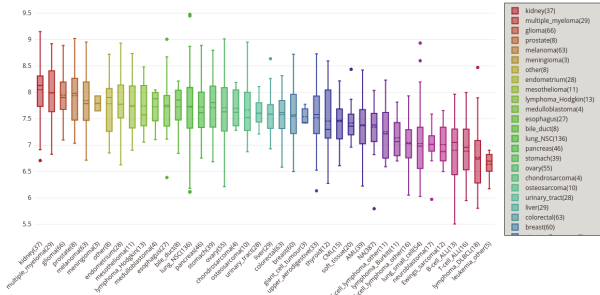**B**

mRNA expression (RNAseq): HSPA1B

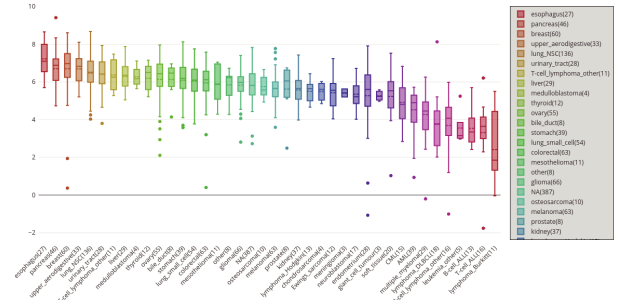**C**

mRNA expression (RNAseq): KLRC2

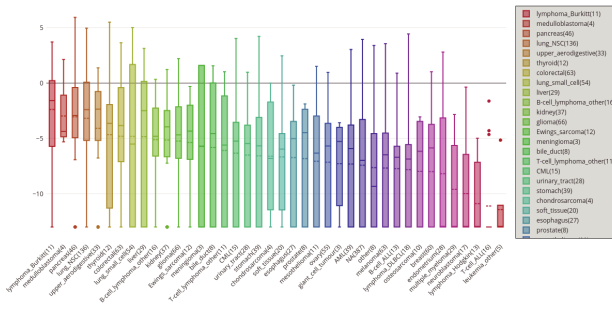**D**

mRNA expression (RNAseq): PSMC6

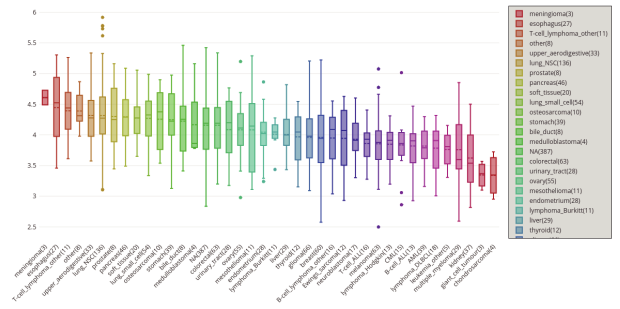**E**

mRNA expression (RNAseq): PSMC6

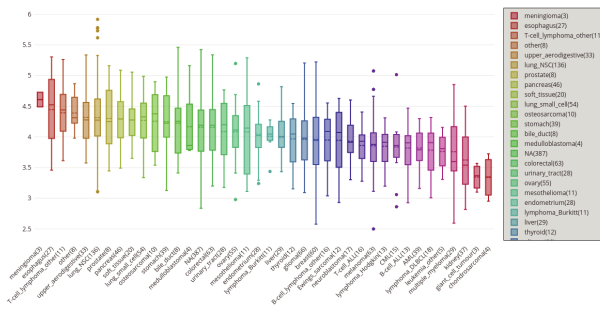**F**

mRNA expression (RNAseq): TAP1

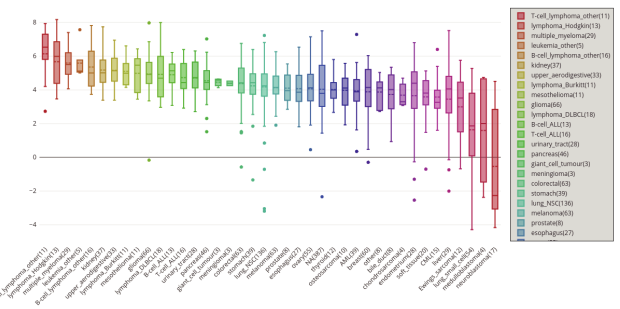

Supplement: Supplementary file [file 22303953]
